# Supplementary material
Source: Springer Nature journal article supplement (https://www.springermedizin.de/resource/supplementary/12939_2013_425_MOESM1_ESM.pdf/9551184)
Supplement: MOESM1 [file 9551184]

# Ideal Model for *Casa de la Mujer Indígena*

**Women's rights framework**  
provision of sexual and reproductive health/domestic violence assistance

Indigenous community leaders

Functions: coordination, promotion activities, service provision  
Service areas: psychological, medical and legal

External advisors or advisory board

Regulatory Entity  
(budget oversight)

NGO Partnership  
(training, communication  
and assistance)

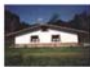

Public Health Services

Legal Institutions

Municipal Authorities
